Abstracts

---

**P17.63. COMBINATION THERAPY WITH TEMOZOLOMIDE, INTERFERON-BETA, AND RIBAVIRIN IN GLIOMA CELL LINES**  
Y. Ochiai<sup>1</sup>, E. Sano<sup>2</sup>, S. Yamamuro<sup>1</sup>, A. Ogino<sup>1</sup>, T. Fukushima<sup>1</sup>, K. Tsumoto<sup>3</sup>, T. Ueda<sup>4</sup>, O. Yutaka<sup>5</sup>, A. Yoshino<sup>1</sup>, and K. Yoichi<sup>1</sup>; <sup>1</sup>Department of Neurosurgery, Nihon University School of Medicine, Tokyo, Japan; <sup>2</sup>Department of Medical Genome Sciences, Graduate School of Frontier Sciences, The University of Tokyo, Chiba, Japan; <sup>3</sup>Medical Proteomics Laboratory, The Institute of Medical Science, Tokyo, Japan; <sup>4</sup>Department of Medical Genome Sciences, Graduate School of Frontier Sciences, The University of Tokyo, Chiba, Japan; <sup>5</sup>New Energy and Industrial Technology Development Organization, Kanagawa, Japan

INTRODUCTION: Although Temozolomide (TMZ) with radiotherapy

significantly improves the survival of newly diagnosed glioblastoma although most patients develop tumor progression within 1-2 years. The Japan Clinical Oncology Group (JCOG) are ongoing a phase II randomized study to evaluate the clinical effectiveness of TMZ and Interferon- $\beta$  (IFN- $\beta$ ) combination therapy in glioblastoma patients. Meanwhile, Ribavirin (RBV) is a standard agent of treating of chronic hepatitis C together with interferon- $\alpha$ . Recently, an anti-tumor effect of RBV was reported in breast cancer and chronic myelocytic leukemia. We evaluated the effect of TMZ, IFN- $\beta$ , and RBV combination therapy in glioma cell lines. METHODS: Glioma cell lines used were A-172, AM-38, T98G, U-87MG, U-138MG, U-251MG, and YH-13. Glioma cell lines were cultured in an incubator for 48 hours and administered with either 1. TMZ (10  $\mu$ M) + IFN- $\beta$  (10 IU/ml) or 2. TMZ (10  $\mu$ M) + IFN- $\beta$  (10 IU/ml) + RBV (10  $\mu$ M). At 72 to 96 hours post-treatment, the number of remaining glioma cells were counted to evaluate the growth-inhibitory effects of each therapy. In addition, cell cycle changes by flow cytometry and p53 activity with western blot analysis were examined from U-87 MG cell line. RESULTS AND CONCLUSIONS: In all cell lines, the triple combination therapy enhanced the growth-inhibitory effect compared to dual combination therapy. Triple therapy led to distribution of G2/M phase of the cell cycle and accumulated p53 activity. Ribavirin enhanced antitumor effect of TMZ and IFN combination therapy in glioma cell lines.
